# Supplementary material for: Infant Exposure to Antituberculosis Drugs via Breast Milk and Assessment of Potential Adverse Effects in Breastfed Infants: Critical Review of Data
Source: MDPI journal article supplement (doi:10.3390/pharmaceutics15041228), 2023-04-13
Supplement: s1 [file s1]

### Supplementary data

**Supplementary Table S1.** Search string for literature collection in PubMed.

| <b>Database</b>                                                         |                                                                                                              |
|-------------------------------------------------------------------------|--------------------------------------------------------------------------------------------------------------|
| <b>PubMed</b>                                                           |                                                                                                              |
| <b>Keywords for the substances</b>                                      | Isoniazid                                                                                                    |
|                                                                         | Rifampicin                                                                                                   |
|                                                                         | Ethambutol                                                                                                   |
|                                                                         | Pyrazinamide                                                                                                 |
|                                                                         | Streptomycin                                                                                                 |
|                                                                         | Levofloxacin                                                                                                 |
|                                                                         | Bedaquiline                                                                                                  |
|                                                                         | Linezolid                                                                                                    |
|                                                                         | Clofazimine                                                                                                  |
|                                                                         | Cycloserine                                                                                                  |
|                                                                         | Terizidone                                                                                                   |
|                                                                         | Pretomanid/PA824                                                                                             |
| <b>Keywords for kinetics, plasma concentration, blood concentration</b> | pharmacokinetics [MeSH term]; plasma concentration [Title/Abstract] OR plasma concentrations Title/Abstract] |
| <b>Keywords for milk concentration</b>                                  | human milk concentration [MeSH term];                                                                        |
| <b>Keywords for infant plasma concentration</b>                         | infant plasma concentration [MeSH term];                                                                     |

**Supplementary Table S2.** Checklist for quality assessment of clinical pharmacokinetic studies according to Gafar et al. (Gafar et al., 2022)

|                                                         |                                                                                                                                                                                                                                                                                                                                                                                |           |       |
|---------------------------------------------------------|--------------------------------------------------------------------------------------------------------------------------------------------------------------------------------------------------------------------------------------------------------------------------------------------------------------------------------------------------------------------------------|-----------|-------|
| <i>Appraising Background</i>                            |                                                                                                                                                                                                                                                                                                                                                                                |           |       |
| 1.                                                      | Was a clear description of the objectives of the study provided?                                                                                                                                                                                                                                                                                                               | Yes/No/NA | 1/0/0 |
| 2.                                                      | Was a clear and comprehensive rationale provided to support the purpose of the study?                                                                                                                                                                                                                                                                                          | Yes/No/NA | 1/0/0 |
| <i>Appraising Study Design and Experimental Methods</i> |                                                                                                                                                                                                                                                                                                                                                                                |           |       |
| 3.                                                      | Was the chosen study design appropriately selected and justified?                                                                                                                                                                                                                                                                                                              | Yes/No/NA | 1/0/0 |
| 4.                                                      | [Slightly modified from the original version] Was the description of at least the drug dose (in mg or mg/kg of body weight) and dosing interval (single-dose, daily, or intermittent [trice weekly] dose, etc.), with addition of drug administration (taken whole by mouth, crushed/dispersed and taken via syringe/nasogastric tube, etc.) justified for the intended study? | Yes/No/NA | 1/0/0 |
| 5.                                                      | Were the outcome measures endpoints of the study appropriate to address the objectives of the study?                                                                                                                                                                                                                                                                           | Yes/No/NA | 1/0/0 |
| 7.                                                      | Were the exclusion criteria of participants included and appropriate for the intended outcomes of the study?                                                                                                                                                                                                                                                                   | Yes/No/NA | 1/0/0 |
| 8.                                                      | Were the relevant baseline characteristics of the participants adequately described?                                                                                                                                                                                                                                                                                           | Yes/No/NA | 1/0/0 |
| 9.                                                      | Were plausible interacting covariates described <i>a priori</i> or in post hoc evaluation?                                                                                                                                                                                                                                                                                     | Yes/No/NA | 1/0/0 |
| 10.                                                     | Was the description of the used biological sample analytical methods or citations of prior validation studies provided in the publication or affiliated appendix?                                                                                                                                                                                                              | Yes/No/NA | 1/0/0 |
| 11.                                                     | Was the method of data sampling of analytics appropriate for the study?                                                                                                                                                                                                                                                                                                        | Yes/No/NA | 1/0/0 |
| 12.                                                     | Was a clear description of the sampling site provided and justified?                                                                                                                                                                                                                                                                                                           | Yes/No/NA | 1/0/0 |
| 13.                                                     | [Slightly modified from the original version] Was the number of samples taken within the sampling period appropriate for the assessment of total plasma exposure (i.e., area under the concentration-time curve from 0-24 h post-dose [AUC0-24]), including assessment of AUC0-24 using non-                                                                                   | Yes/No/NA | 1/0/0 |

compartmental pharmacokinetic analysis or population pharmacokinetic modelling?

|     |                                                                                                                                      |           |       |
|-----|--------------------------------------------------------------------------------------------------------------------------------------|-----------|-------|
| 14. | Were sample storage conditions appropriate and described in a manner that could be accurately replicated?                            | Yes/No/NA | 1/0/0 |
| 15. | If applicable, was there a clear description of the pharmacokinetic model, its development, validation and justification for use.    | Yes/No/NA | 1/0/0 |
| 16. | If applicable, was the described population pharmacokinetic approach validation method appropriate for the analysis?                 | Yes/No/NA | 1/0/0 |
| 17. | Were the essential pharmacokinetic parameters required to make the results applicable in clinical settings included?                 | Yes/No/NA | 1/0/0 |
| 18. | Were the pharmacokinetic equations used to calculate the patient's pharmacokinetic parameters presented or cited within the article? | Yes/No/NA | 1/0/0 |

---

*Appraising Applied Statistics*

|    |                                                                                                                                 |           |       |
|----|---------------------------------------------------------------------------------------------------------------------------------|-----------|-------|
| 19 | Were the chosen statistical tests and software to perform the statistical analysis appropriate to achieve the study objectives? | Yes/No/NA | 1/0/0 |
|----|---------------------------------------------------------------------------------------------------------------------------------|-----------|-------|

---

*Appraising Results*

|    |                                                                                                                      |           |       |
|----|----------------------------------------------------------------------------------------------------------------------|-----------|-------|
| 20 | Were all patients enrolled in the study accounted for?                                                               | Yes/No/NA | 1/0/0 |
| 21 | In the event of missing data or outliers, was the process for analysis justified and appropriate?                    | Yes/No/NA | 1/0/0 |
| 22 | Were appropriate summary statistics to describe centrality and variance used to present the pharmacokinetic results? | Yes/No/NA | 1/0/0 |

---

**Supplementary Table S3.** Relevant parameters used in the calculation of milk/plasma ratio for pretomanid.

| Parameter               | Value       | Reference                                                                                                   |
|-------------------------|-------------|-------------------------------------------------------------------------------------------------------------|
| pH plasma               | 7.4         | (Atherton, 2009)                                                                                            |
| pH milk                 | 6.60 ± 0.28 | (Filatava et al., 2023)                                                                                     |
| Crematocrit             | 9.53 ± 3.98 | (Meier et al., 2006)                                                                                        |
| Fraction of fat in milk | 0.038-0.039 | (Bobiński and Bobińska, 2022)                                                                               |
| Log P <sub>O/W</sub>    | 2.42        | Assessment Report, 25 June 2020<br>EMA/200048/2020<br>Committee for Medicinal Products for Human Use (CHMP) |
| Molecular weight        | 359.26      | PubChem                                                                                                     |
| pKa                     | 7.0         | PubChem                                                                                                     |
| Fu plasma               | 13.6        | PubChem                                                                                                     |

**Equations for calculation of M:P ratio according to Abduljalil et al. (Abduljalil et al., 2021)**

$$f_p^{un} = \frac{1}{1 + 10^{(pKa - pH_{Plasma})}}$$

$$f_{mk}^{un} = \frac{1}{1 + 10^{(pKa - pH_{Milk})}}$$

$$fu_{skimmed} = \frac{fu_p^{0.448}}{0.000694^{0.448} + fu_p^{0.448}}$$

$$fu_{mk} = \frac{1}{\frac{f_w}{fu_{skimmed}} + f_{fat} \cdot \log P_{milk}}$$

$$\frac{S}{W} = \frac{1}{1 + Crt \cdot (fu_{mk} \cdot \log P_{o:w} - 1)}$$

$$\frac{M}{P} = \frac{fu_p \cdot f_p^{un}}{f_{mk}^{un}} \cdot \frac{1}{fu_{mk} \cdot \left(\frac{S}{W}\right)}$$

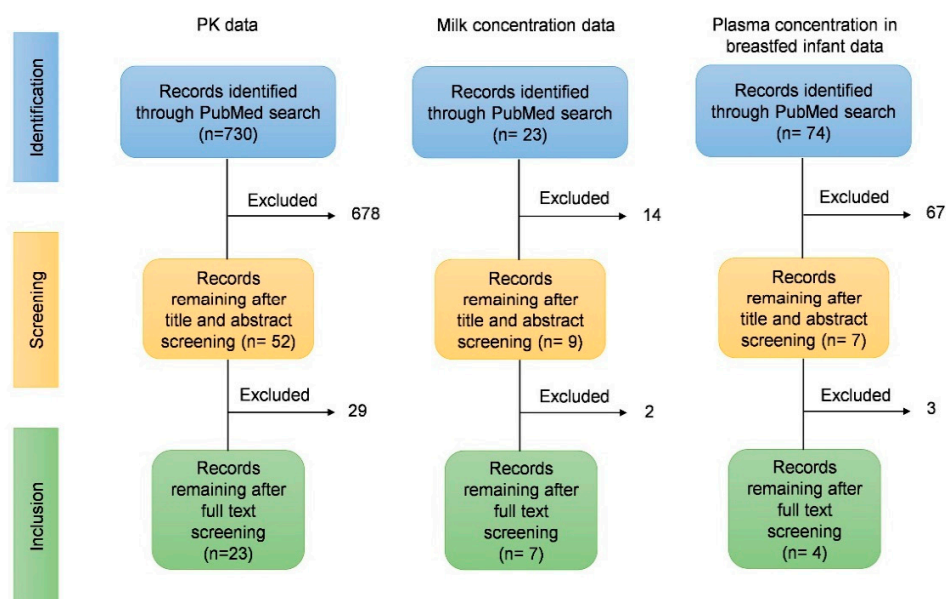

**Supplementary Figure S1.** Flowchart outlining the cumulative number of retrieved articles at each stage of the literature review for the pharmacokinetics, milk concentrations and breastfed infant's plasma concentration data of antituberculosis drugs.

- ABDULJALIL, K., PANSARI, A., NING, J. & JAMEI, M. 2021. Prediction of drug concentrations in milk during breastfeeding, integrating predictive algorithms within a physiologically-based pharmacokinetic model. *CPT Pharmacometrics Syst Pharmacol*, 10, 878-889.
- ATHERTON, J. C. 2009. Acid-base balance: maintenance of plasma pH. *Anaesthesia & Intensive Care Medicine*, 10, 557-561.
- BOBIŃSKI, R. & BOBIŃSKA, J. 2022. Fatty acids of human milk - a review. *Int J Vitam Nutr Res*, 92, 280-291.
- FILATAVA, E. J., SHELLY, C. E., OVERTON, N. E., GREGAS, M., GLYNN, R. & GREGORY, K. E. 2023. Human milk pH is associated with fortification, postpartum day, and maternal dietary intake in preterm mother-infant dyads. *J Perinatol*, 43, 60-67.
- GAFAR, F., WASMANN, R. E., MCILLERON, H. M., AARNOUTSE, R. E., SCHAAF, H. S., MARAIS, B. J., AGARWAL, D., ANTWI, S., BANG, N. D., BEKKER, A., BELL, D. J., CHABALA, C., CHOO, L., DAVIES, G. R., DAY, J. N., DAYAL, R., DENTI, P., DONALD, P. R., ENGIDAWORK, E., GARCIA-PRATS, A. J., GIBB, D., GRAHAM, S. M., HESSELING, A. C., HEYSELL, S. K., IDRIS, M. I., KABRA, S. K., KINIKAR, A., HEMANTH KUMAR, A. K., KWARA, A., LODHA, R., MAGIS-ESCURRA, C., MARTINEZ, N., MATHEW, B. S., MAVÉ, V., MDUMA, E., MLOTHA-MITOLE, R., MPAGAMA, S. G., MUKHERJEE, A., NATAPRAWIRA, H. M., PELOQUIN, C. A., POUPLIN, T., RAMACHANDRAN, G., RANJALKAR, J., ROY, V., RUSLAMI, R., SHAH, I., SINGH, Y., STURKENBOOM, M. G. G., SVENSSON, E. M., SWAMINATHAN, S., THATTE, U., THEE, S., THOMAS, T. A., TIKISO, T., TOUW, D. J., TURKOVA, A., VELPANDIAN, T., VERHAGEN, L. M., WINCKLER, J. L., YANG,

- H., YUNIVITA, V., TAXIS, K., STEVENS, J. & ALFFENAAR, J. C. 2022. Global estimates and determinants of antituberculosis drug pharmacokinetics in children and adolescents: a systematic review and individual patient data meta-analysis. *Eur Respir J*.
- MEIER, P. P., ENGSTROM, J. L., ZULEGER, J. L., MOTYKOWSKI, J. E., VASAN, U., MEIER, W. A., HARTMANN, P. E. & WILLIAMS, T. M. 2006. Accuracy of a user-friendly centrifuge for measuring creatocrits on mothers' milk in the clinical setting. *Breastfeed Med*, 1, 79-87.
